# Supplementary material for: Stable neutralizing antibody levels six months after mild and severe COVID-19 episode
Source: bioRxiv or medRxiv preprint supplement (doi:10.1101/2020.11.22.389056), 2020-11-24
Supplement: Supplementary file [file media-1.pdf]

## SUPPLEMENTARY INFORMATION

### Stable neutralizing antibody levels six months after mild and severe COVID-19 episode

Edwards Pradenas<sup>1,¶</sup>, Benjamin Trinité<sup>1,¶</sup>, Víctor Urrea<sup>1</sup>, Silvia Marfil<sup>1</sup>, Carlos Ávila-Nieto<sup>1</sup>, María Luisa Rodríguez de la Concepción<sup>1</sup>, Ferran Tarrés-Freixas<sup>1</sup>, Silvia Pérez-Yanes<sup>1,2</sup>, Carla Rovirosa<sup>1</sup>, Erola Ainsua-Enrich<sup>1</sup>, Jordi Rodon<sup>3</sup>, Júlia Vergara-Alert<sup>3</sup>, Joaquim Segalés<sup>4,5</sup>, Victor Guallar<sup>6,7</sup>, Alfonso Valencia<sup>6,7</sup>, Nuria Izquierdo-Useros<sup>1</sup>, Roger Paredes<sup>1,8</sup>, Lourdes Mateu<sup>8</sup>, Anna Chamorro<sup>8</sup>, Marta Massanella<sup>1</sup>, Jorge Carrillo<sup>1</sup>, Bonaventura Clotet<sup>1,8,9</sup> and Julià Blanco<sup>1,9,\*</sup>

<sup>1</sup>IrsiCaixa AIDS Research Institute, Germans Trias i Pujol Research Institute (IGTP), Can Ruti Campus, UAB, 08916, Badalona, Catalonia, Spain

<sup>2</sup>Laboratorio de Inmunología Celular y Viral, Unidad de Farmacología, Sección de Medicina, Facultad de Ciencias de la Salud, Universidad de La Laguna (ULL), La Laguna, 38071, Tenerife, Spain.

<sup>3</sup>IRTA Centre de Recerca en Sanitat Animal (CRESA, IRTA-UAB), Campus de la UAB, 08193, Bellaterra, Catalonia, Spain

<sup>4</sup>UAB, Centre de Recerca en Sanitat Animal (IRTA-UAB), Campus de la UAB, 08193, Bellaterra, Catalonia, Spain

<sup>5</sup>Departament de Sanitat i Anatomia Animals, Facultat de Veterinària, UAB, 08193, Bellaterra, Catalonia, Spain

<sup>6</sup>Barcelona Supercomputing Center, 08034, Barcelona, Catalonia, Spain

<sup>7</sup>Catalan Institution for Research and Advanced Studies (ICREA), 08010, Barcelona, Catalonia, Spain

<sup>8</sup>Infectious Diseases Department, Fight against AIDS Foundation (FLS), Germans Trias i Pujol Hospital, 08916, Badalona, Catalonia, Spain

<sup>9</sup>University of Vic–Central University of Catalonia (UVic-UCC), 08500, Vic, Catalonia, Spain

<sup>¶</sup>Equal contribution

#### \*Corresponding author:

Julià Blanco, PhD

Senior Researcher

Institut de Recerca de la Sida. IrsiCaixa, IGTP, Hospital Germans Trias i Pujol  
Ctra. de Canyet s/n. 2a Planta Maternal. 08916 Badalona. Barcelona

Email: [jblanco@irsicaixa.es](mailto:jblanco@irsicaixa.es)

Tel: +34 934 656 374

Fax: +34 934 653 968

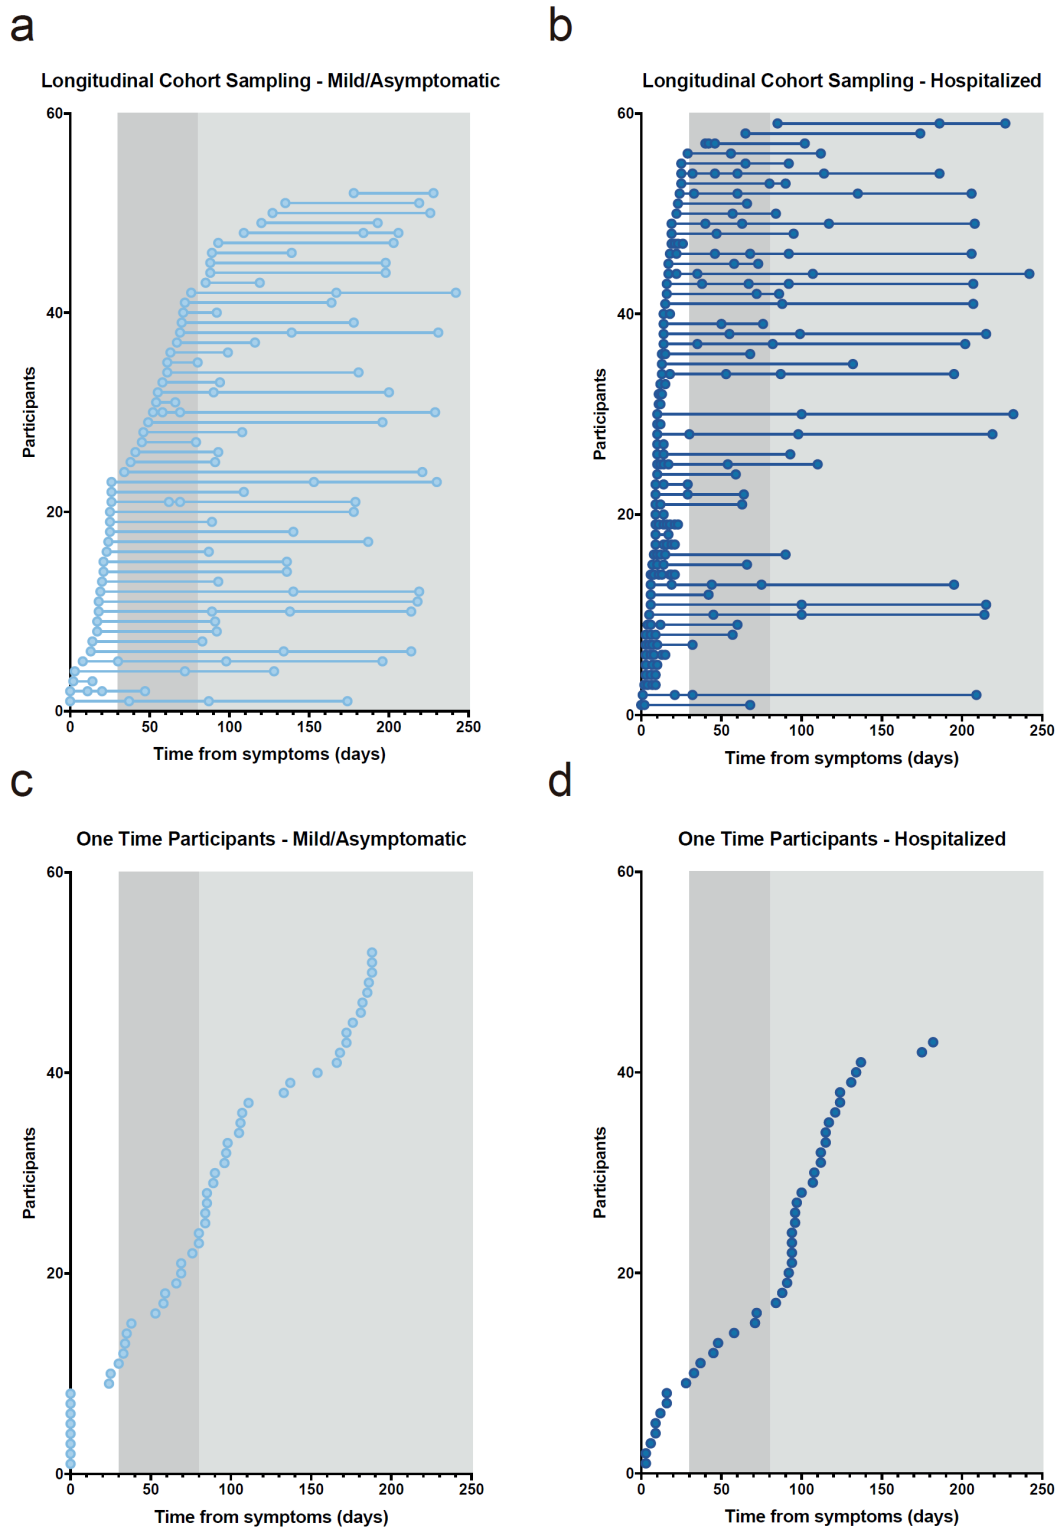

**Figure S1. Patient and sampling distribution across the follow-up period.** Top panels show the time points for sample collection among mild/asymptomatic (**a**) and hospitalized (**b**) individuals. Bottom panels show the time points for samples of individuals with a single measurement: **c**, mild/asymptomatic; **d**, hospitalized. Time count starts on the day of symptom onset, except for asymptomatic individuals, for whom the serological diagnosis was considered. The areas define the periods considered for the longitudinal analysis: days 0-30 (white), 30-80 (dark grey) and after 80 days (light grey).

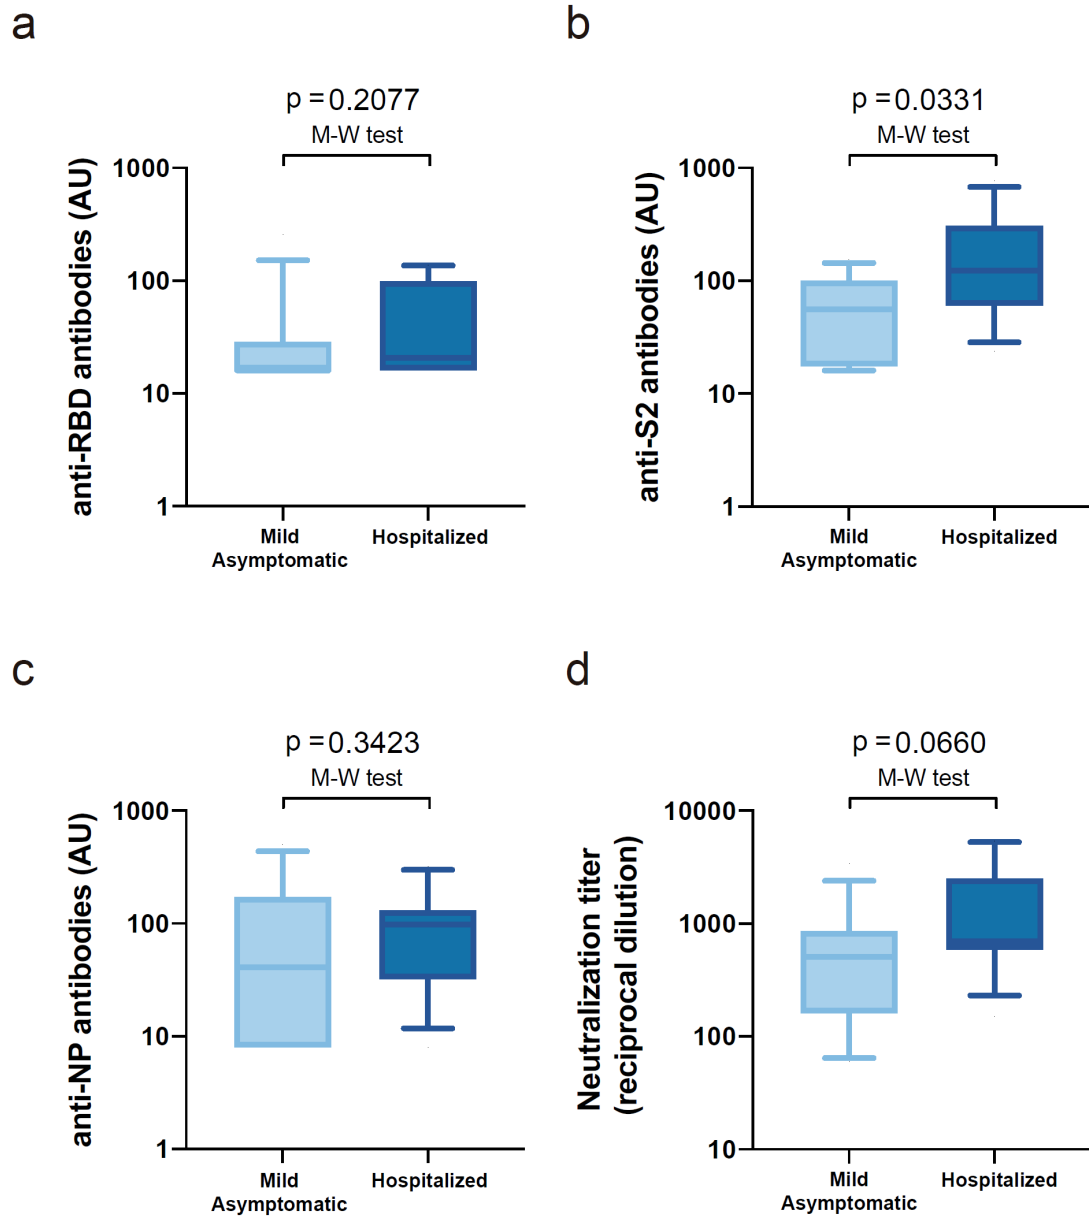

**Figure S2. Antibody titers at the end of the follow-up period.** Antibody titers of the last measure for IgG against the receptor binding domain (RBD) (a), S2 (b), and nucleoprotein (NP) (c) on a subset of individuals with largest follow-up ( $n=14$  for mild/asymptomatic and  $n=14$  for hospitalized). Panel d shows the neutralizing activity of the same subset of individuals at the end of the follow-up period. Boxes show the median and the interquartile range, and bars the 10<sup>th</sup> and 90<sup>th</sup> percentiles. Severity groups (i.e., mild/asymptomatic and hospitalized) were compared using the Mann-Whitney test.
